# Supplementary material for: Iron intake, body iron status, and risk of breast cancer: a systematic review and meta-analysis
Source: PubMed Central journal article supplement (PMC6555759; doi:10.1186/s12885-019-5642-0), 2019-06-06
Supplement: 12885_2019_5642_MOESM4_ESM.pdf [file 12885_2019_5642_MOESM4_ESM.pdf]

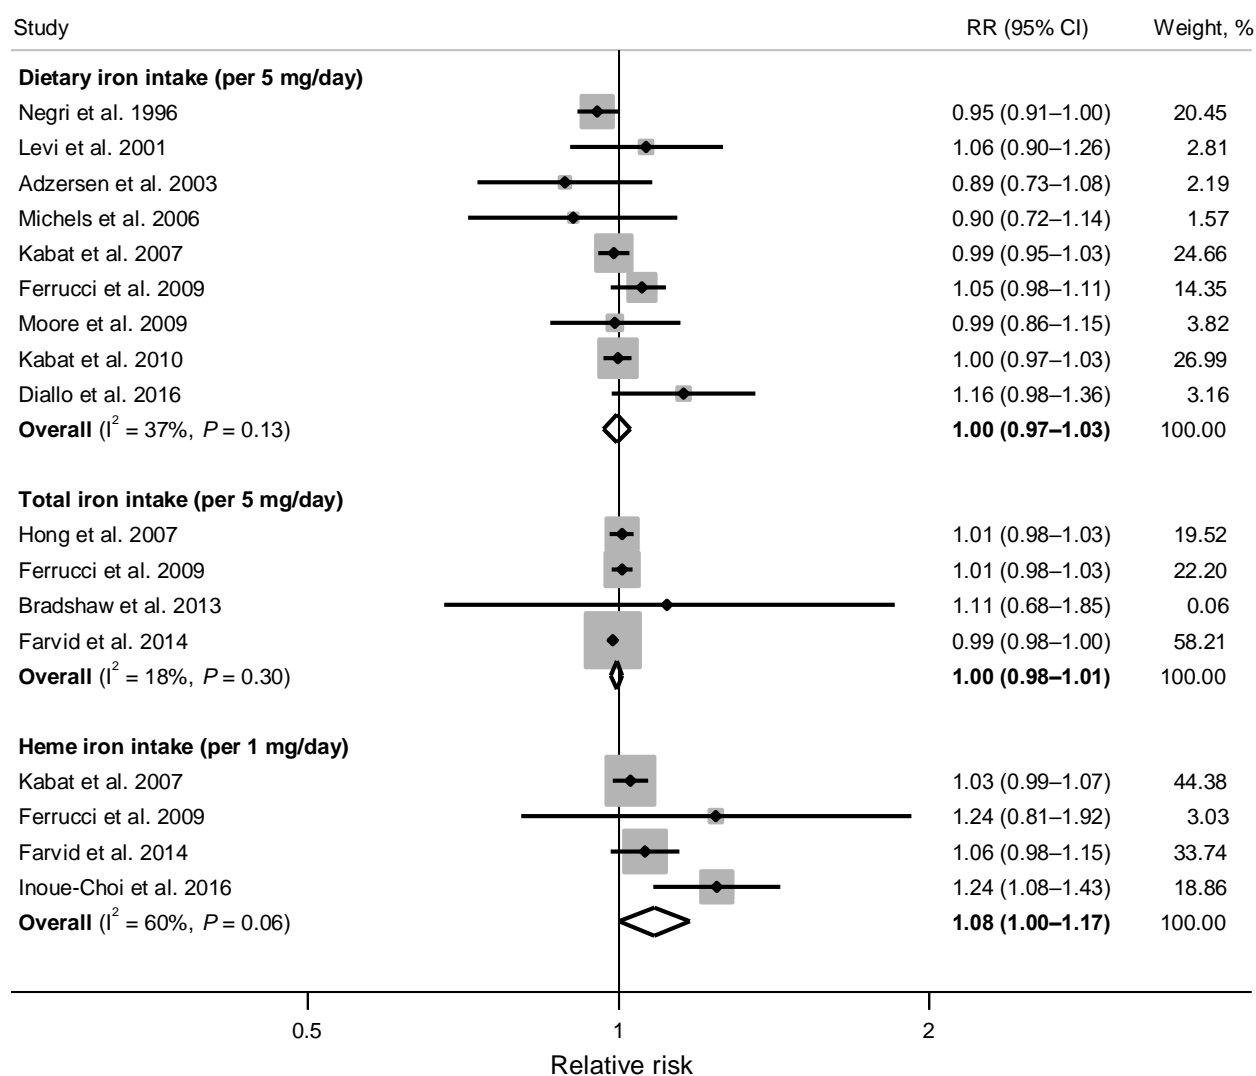

**Fig. S1** Forest plot of linear dose-response analyses for the associations between iron intake and breast cancer risk. The diamonds represent the pooled relative risks and corresponding 95% confidence intervals obtained from random-effects meta-analyses. The dots and horizontal lines represent the relative risks and corresponding 95% confidence intervals of individual studies, and the sizes of shaded squares are proportional to the weight contributed by each study to the pooled estimate.  $I^2$  is the proportion of the total variability attributable to between-study heterogeneity, and  $P$  is from Cochran's  $Q$  test evaluating the presence of heterogeneity.

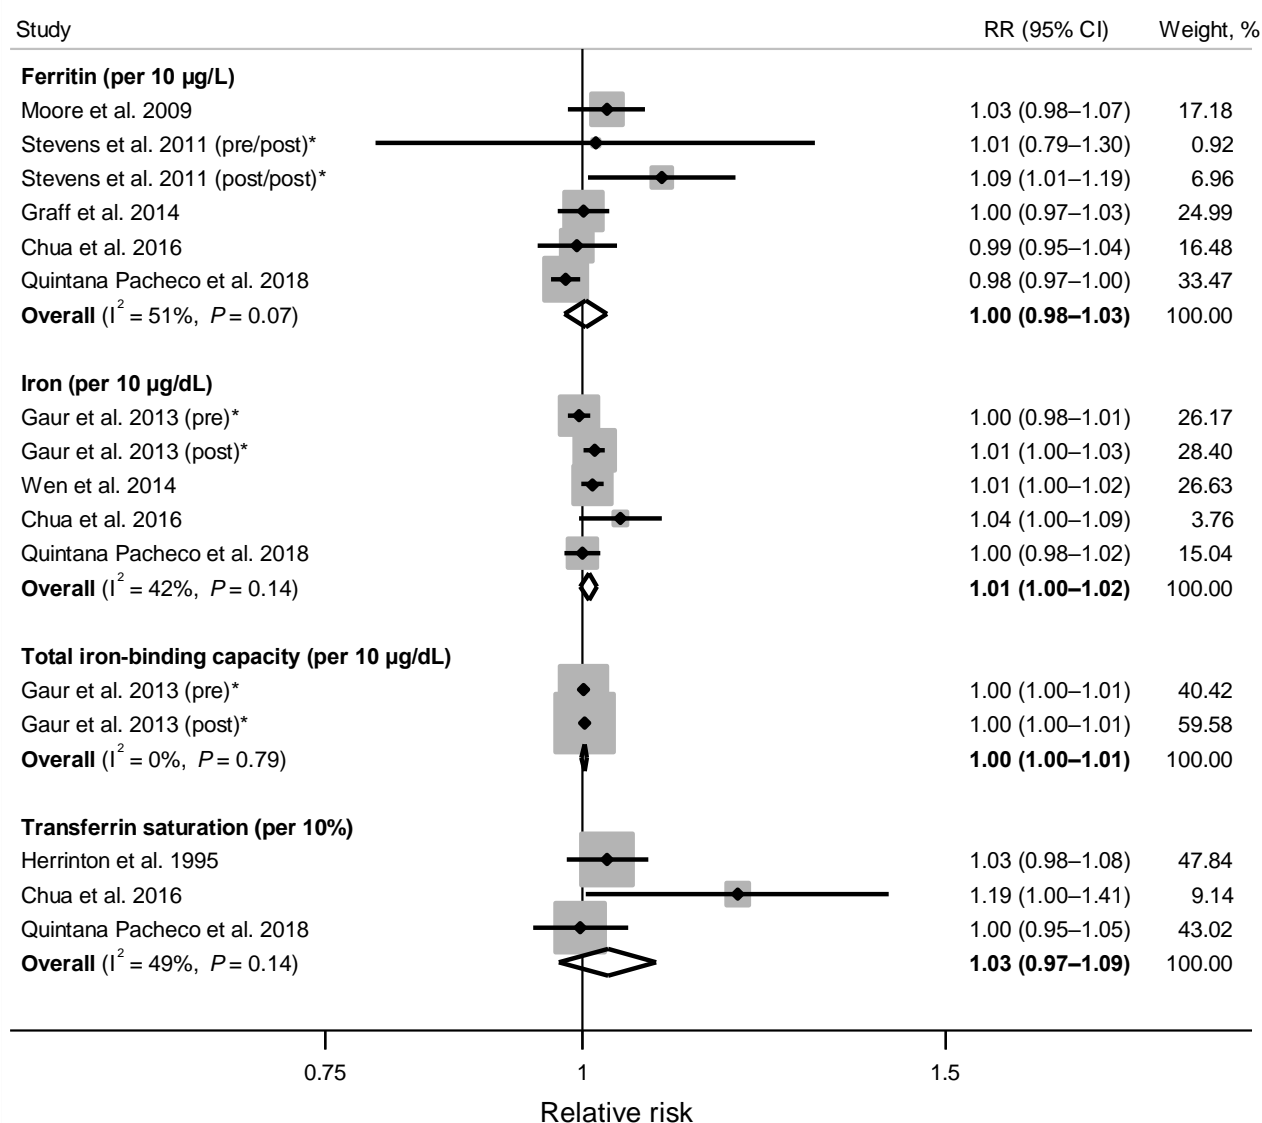

**Fig. S2** Forest plot of linear dose-response analyses for the associations between serum/plasma indicators of body iron status and breast cancer risk. The diamonds represent the pooled relative risks and corresponding 95% confidence intervals obtained from random-effects meta-analyses. The dots and horizontal lines represent the relative risks and corresponding 95% confidence intervals of individual studies, and the sizes of shaded squares are proportional to the weight contributed by each study to the pooled estimate.  $I^2$  is the proportion of the total variability attributable to between-study heterogeneity, and  $P$  is from Cochran's Q test evaluating the presence of heterogeneity. \*Stevens et al. 2011 reported separate estimates for premenopausal (pre/post) and postmenopausal (post/post) ferritin levels in relation to postmenopausal breast cancer risk; Gaur et al. 2013 reported separate estimates for premenopausal (pre) and postmenopausal (post) breast cancer.
