# Supplementary material for: Iron intake, body iron status, and risk of breast cancer: a systematic review and meta-analysis
Source: PubMed Central journal article supplement (PMC6555759; doi:10.1186/s12885-019-5642-0), 2019-06-06
Supplement: 12885_2019_5642_MOESM5_ESM.pdf [file 12885_2019_5642_MOESM5_ESM.pdf]

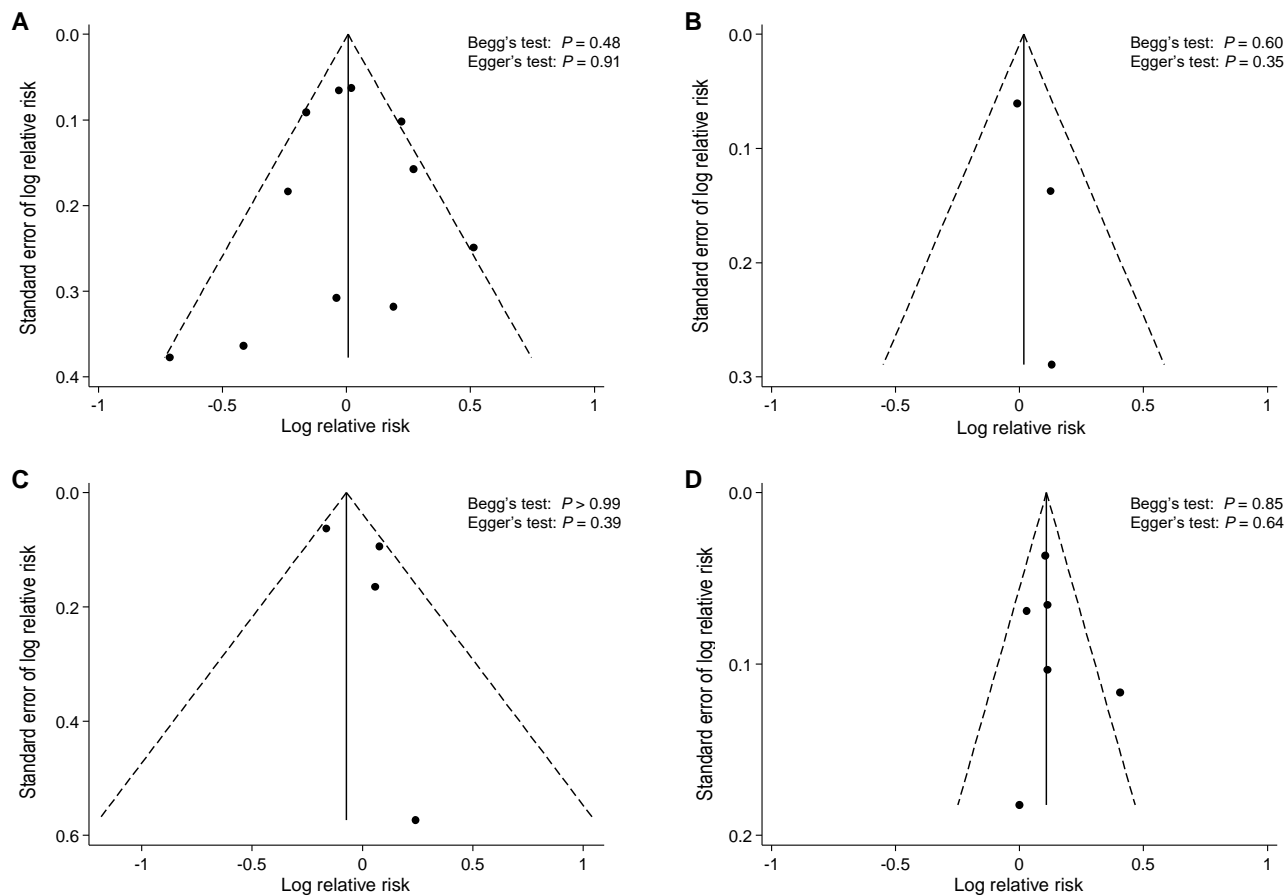

**Fig. S3** Funnel plots for the evaluation of publication bias in the meta-analysis of breast cancer risk in relation to the highest vs. lowest category of (A) dietary iron intake; (B) supplemental iron intake; (C) total iron intake; and (D) heme iron intake. The dots represent estimates from individual studies. The vertical solid lines represent pooled effect estimates, and the dashed diagonal lines represent pseudo 95% confidence intervals. All statistical tests are two-sided.

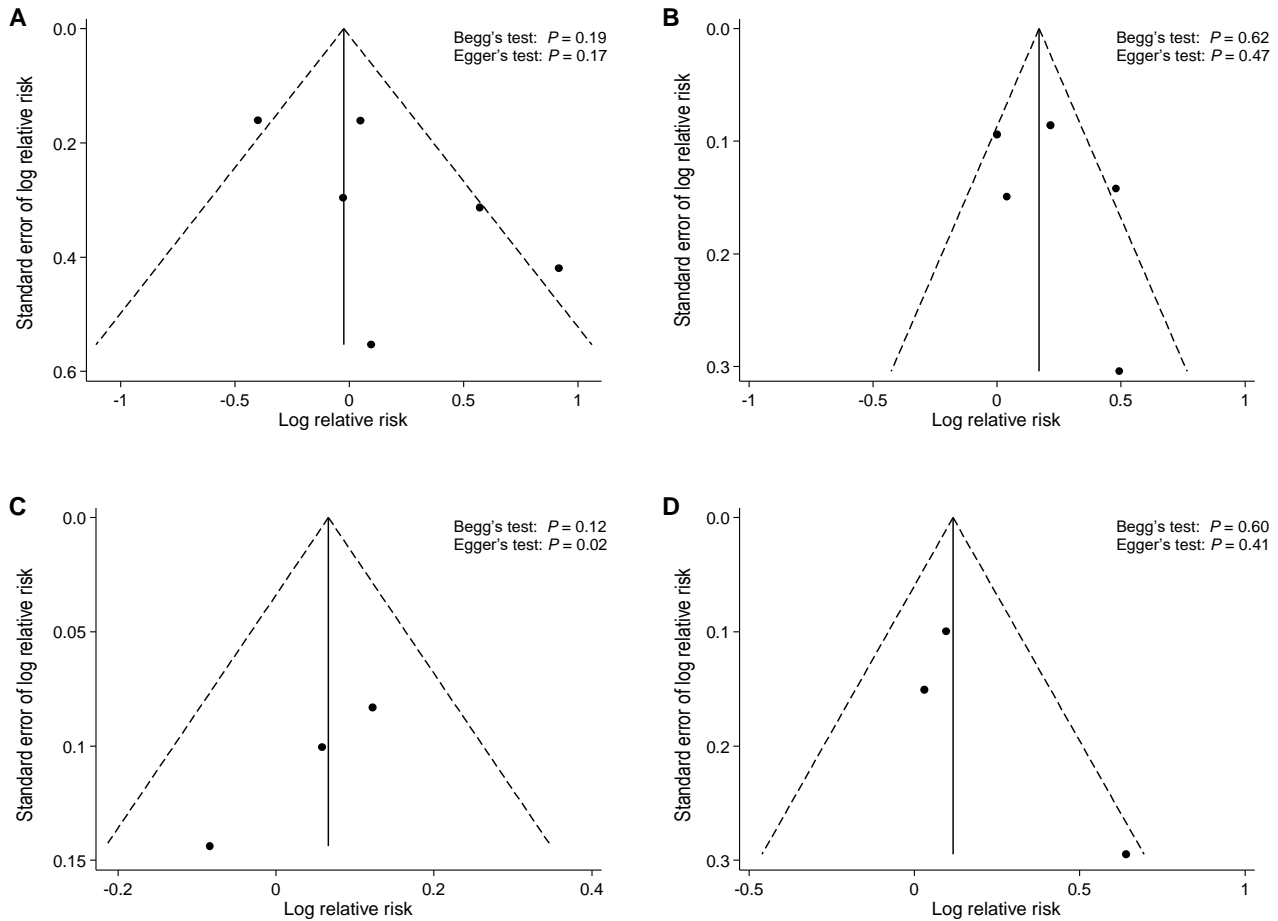

**Fig. S4** Funnel plots for the evaluation of publication bias in the meta-analysis of breast cancer risk in relation to the highest vs. lowest category of serum/plasma (A) ferritin; (B) iron; (C) total iron-binding capacity or transferrin; and (D) transferrin saturation. The dots represent estimates from individual studies. The vertical solid lines represent pooled effect estimates, and the dashed diagonal lines represent pseudo 95% confidence intervals. All statistical tests are two-sided.
