# Supplementary material for: Iron intake, body iron status, and risk of breast cancer: a systematic review and meta-analysis
Source: PubMed Central journal article supplement (PMC6555759; doi:10.1186/s12885-019-5642-0), 2019-06-06
Supplement: 12885_2019_5642_MOESM6_ESM.pdf [file 12885_2019_5642_MOESM6_ESM.pdf]

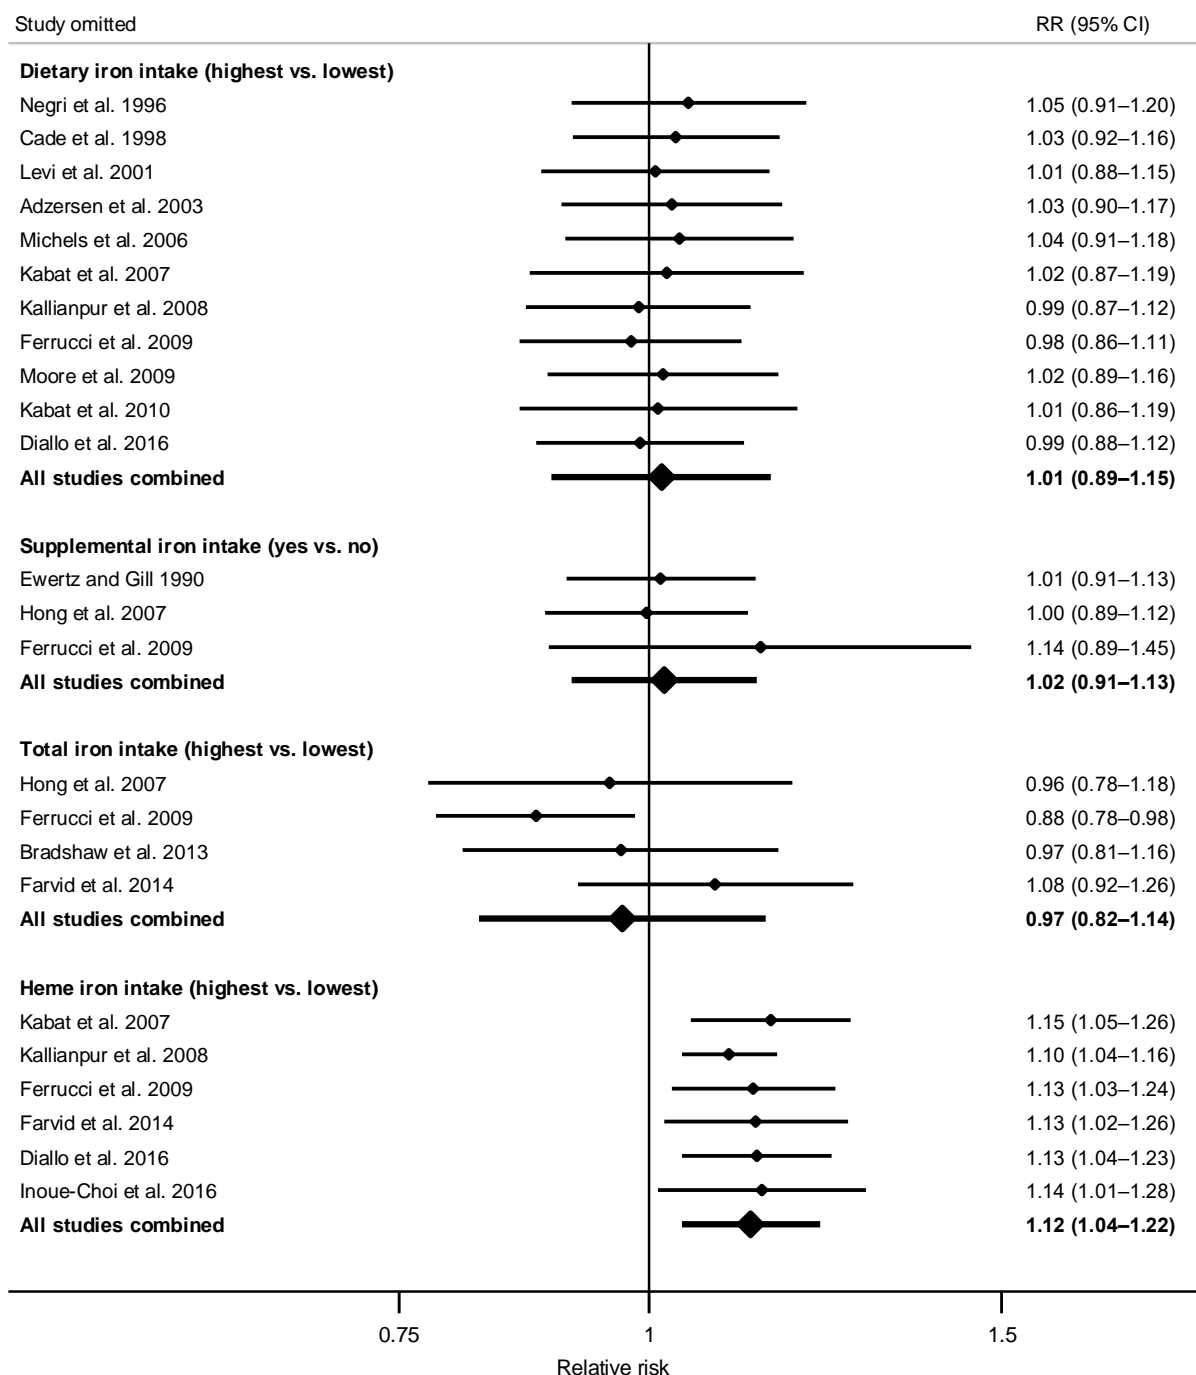

**Fig. S5** Sensitivity analysis investigating the influence of individual studies on the pooled effect estimates in the *highest vs. lowest* meta-analyses of dietary, supplemental, total, and heme iron intake in relation to breast cancer risk. The dots and horizontal lines represent the pooled relative risks and corresponding 95% confidence intervals when each study is omitted. The diamonds and thick horizontal lines represent the pooled relative risks and corresponding 95% confidence intervals when all studies are combined (i.e., none omitted).

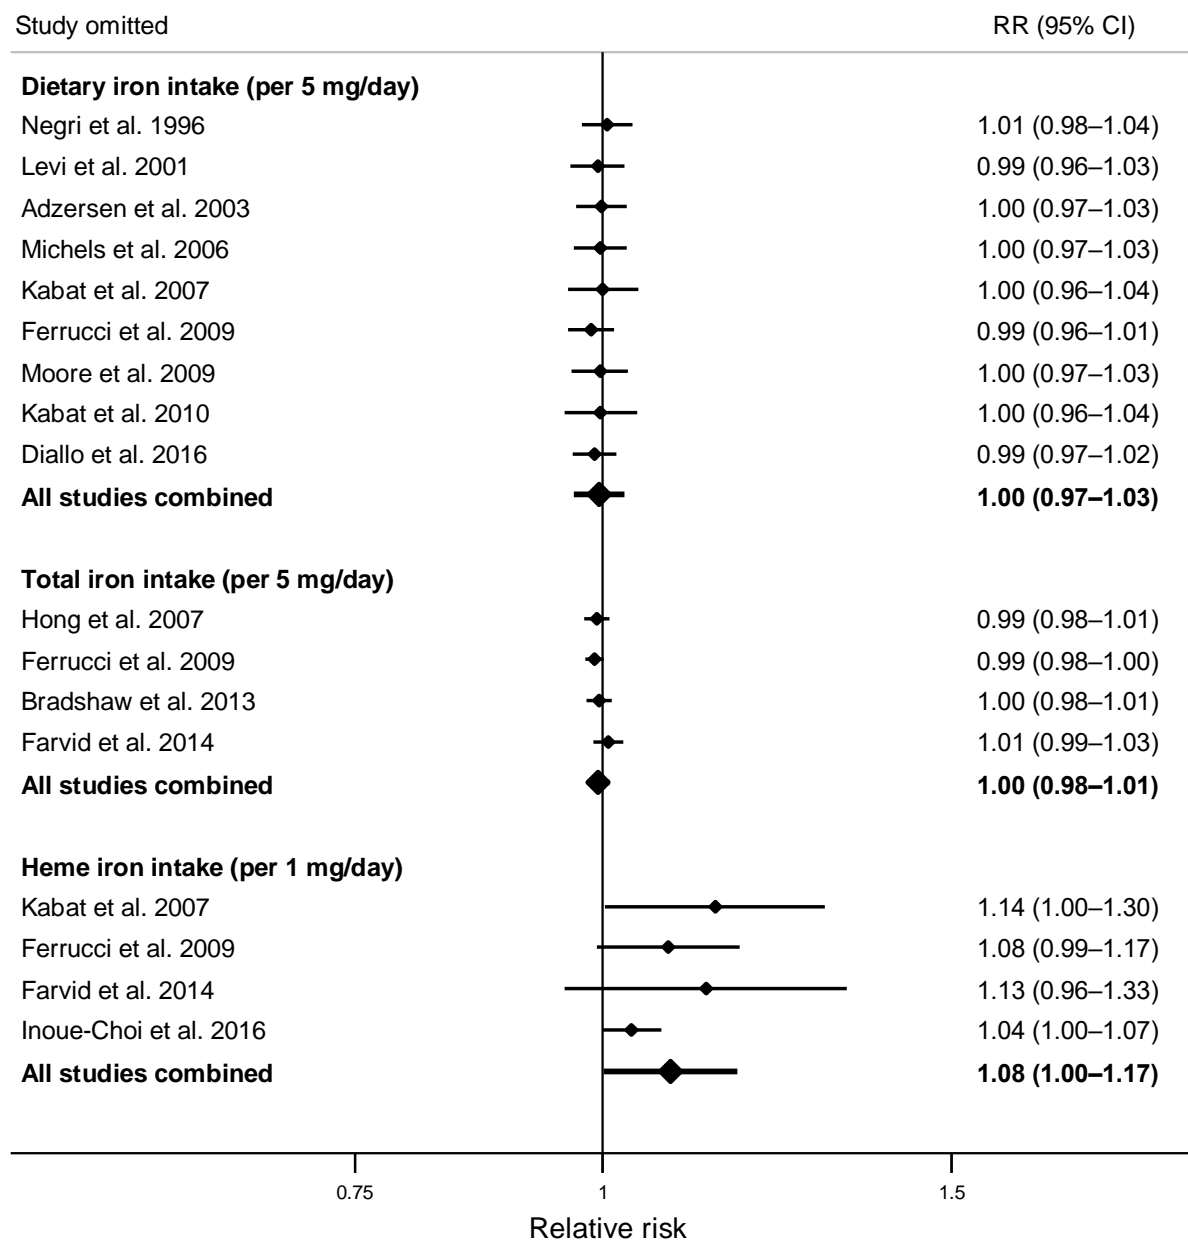

**Fig. S6** Sensitivity analysis investigating the influence of individual studies on the pooled effect estimates in the *linear dose-response* meta-analyses of dietary, total, and heme iron intake in relation to breast cancer risk. The dots and horizontal lines represent the pooled relative risks and corresponding 95% confidence intervals when each study is omitted. The diamonds and thick horizontal lines represent the pooled relative risks and corresponding 95% confidence intervals when all studies are combined (i.e., none omitted).

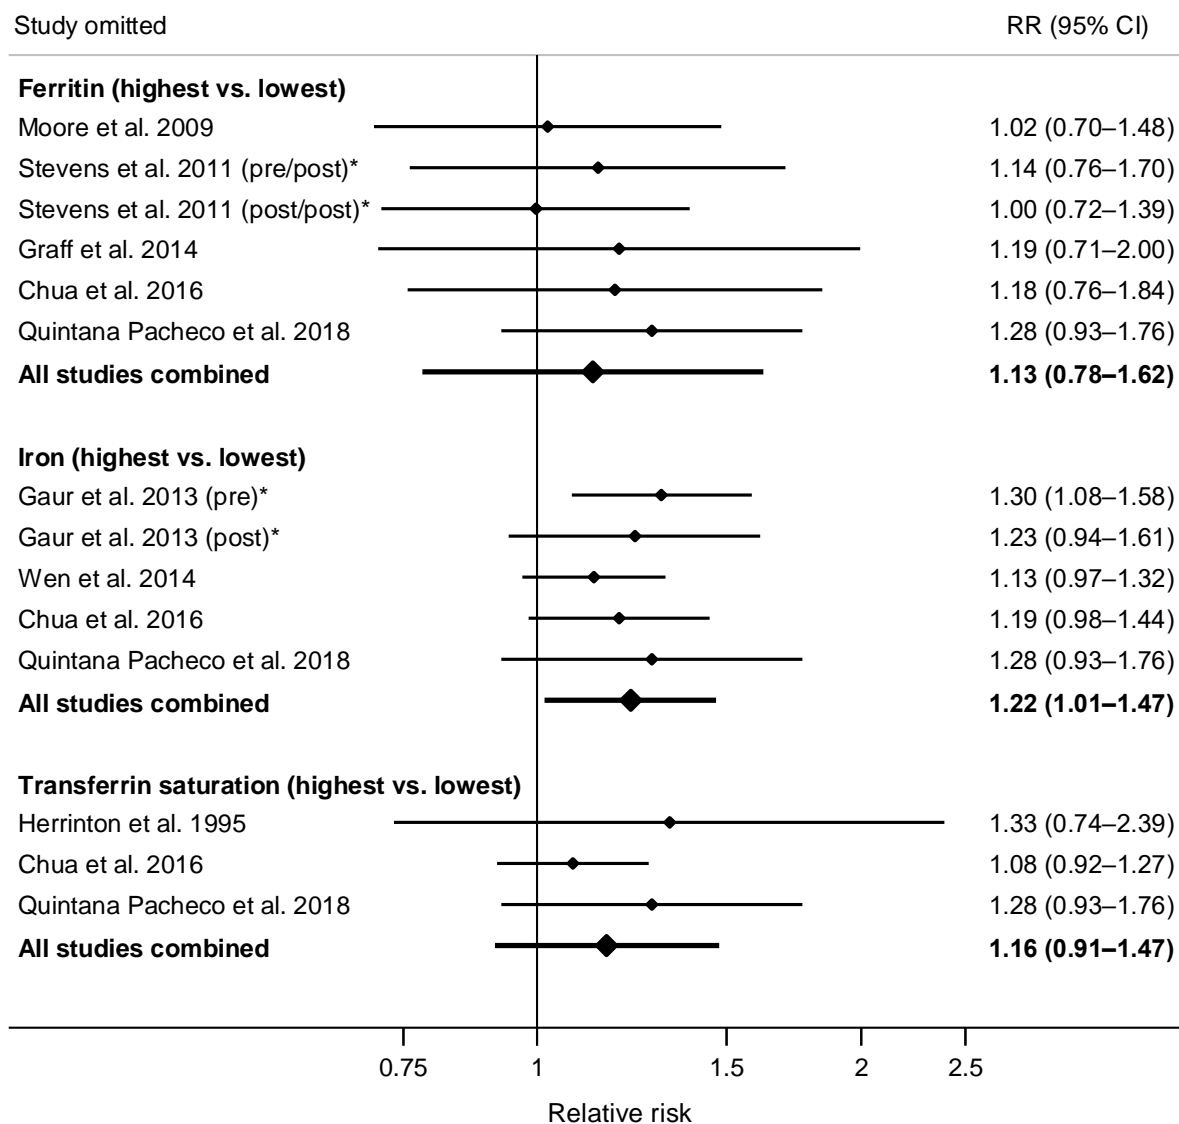

**Fig. S7** Sensitivity analysis investigating the influence of individual studies on the pooled effect estimates in the *highest vs. lowest* meta-analyses of serum/plasma ferritin, iron, and transferrin saturation in relation to breast cancer risk. The dots and horizontal lines represent the pooled relative risks and corresponding 95% confidence intervals when each study is omitted. The diamonds and thick horizontal lines represent the pooled relative risks and corresponding 95% confidence intervals when all studies are combined (i.e., none omitted). \*Stevens et al. 2011 reported separate estimates for premenopausal (pre/post) and postmenopausal (post/post) ferritin levels in relation to postmenopausal breast cancer risk; Gaur et al. 2013 reported separate estimates for premenopausal (pre) and postmenopausal (post) breast cancer.

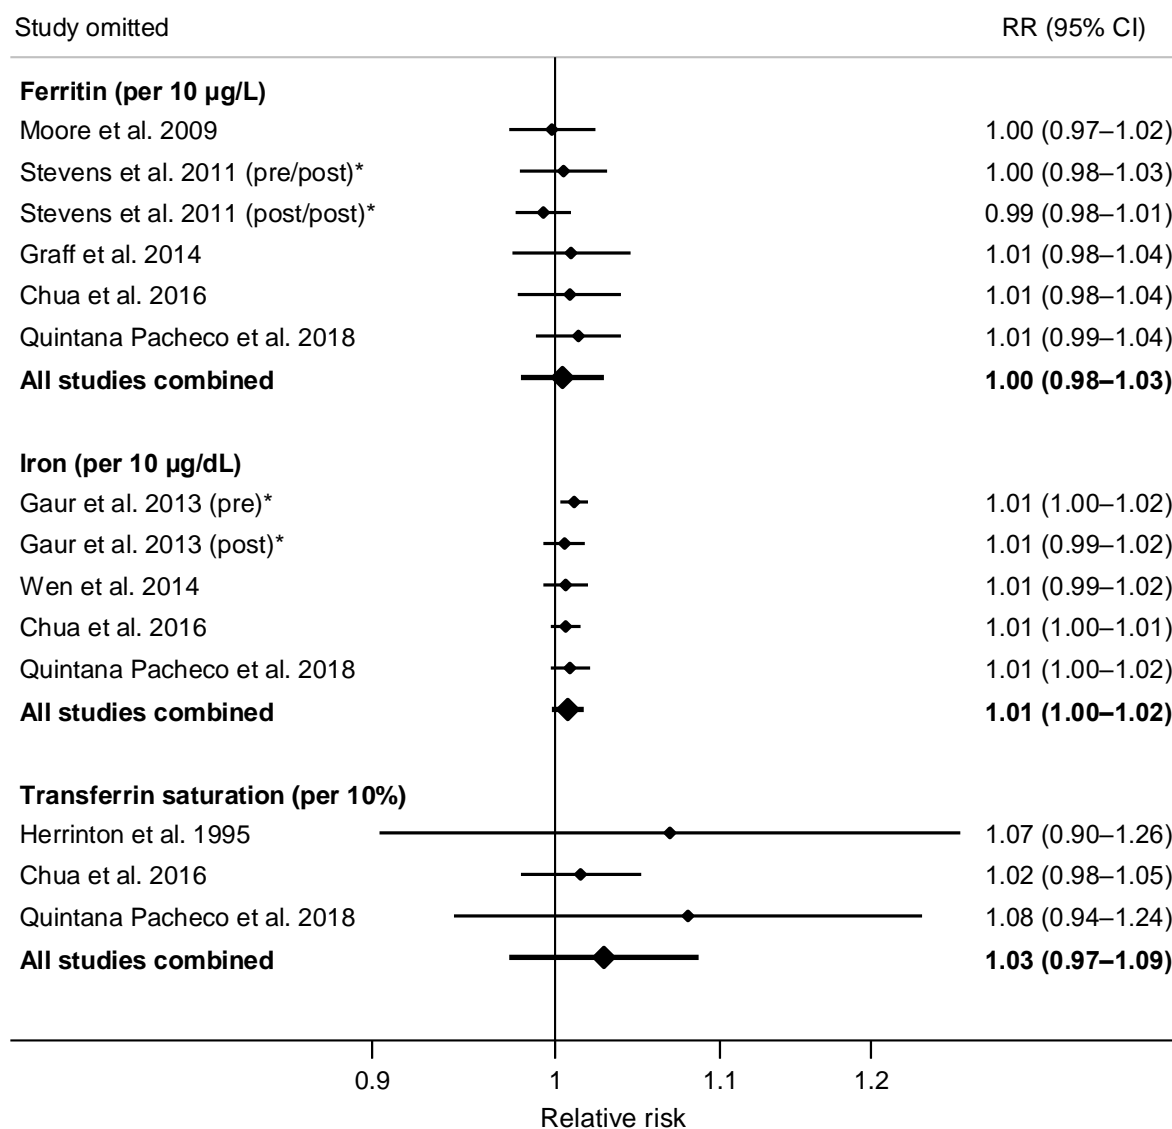

**Fig. S8** Sensitivity analysis investigating the influence of individual studies on the pooled effect estimates in the *linear dose-response* meta-analyses of serum/plasma ferritin, iron, and transferrin saturation in relation to breast cancer risk. The dots and horizontal lines represent the pooled relative risks and corresponding 95% confidence intervals when each study is omitted. The diamonds and thick horizontal lines represent the pooled relative risks and corresponding 95% confidence intervals when all studies are combined (i.e., none omitted). \*Stevens et al. 2011 reported separate estimates for premenopausal (pre/post) and postmenopausal (post/post) ferritin levels in relation to postmenopausal breast cancer risk; Gaur et al. 2013 reported separate estimates for premenopausal (pre) and postmenopausal (post) breast cancer.
